# Supplementary material for: Observation and control of Casimir effects in a sphere-plate-sphere system
Source: PubMed Central journal article supplement (PMC9579181; doi:10.1038/s41467-022-33915-4), 2022-10-18
Supplement: 41467_2022_33915_MOESM2_ESM.pdf [file 41467_2022_33915_MOESM2_ESM.pdf]

**Supplementary Software:** Custom Matlab codes to calculate the Casimir interaction in the sphereplate-sphere system.
